# Supplementary material for: Machine Learning Classification of Self-Organized Surface Structures in Ultrashort-Pulse Laser Processing Based on Light Microscopic Images
Source: MDPI journal article supplement (doi:10.3390/mi15040491), 2024-04-02
Supplement: s1 [file s1]

## Supplementary Materials

Height elevation profiles for surface structure types (REF, LIPSS, CRATER, MICRO).

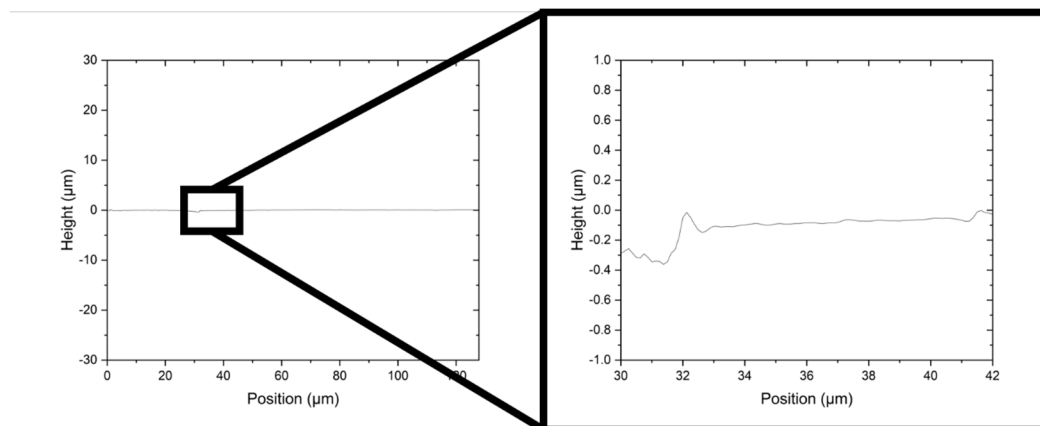

**Figure S1.** Height profile of REF sample with detail.

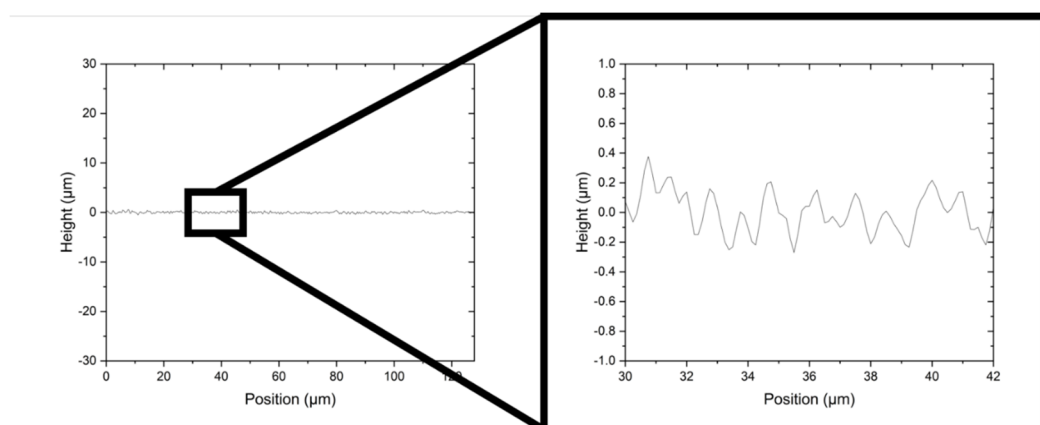

**Figure S2.** Height profile of LIPSS sample with detail. Measurement was performed perpendicular to the orientation of the LIPSS.

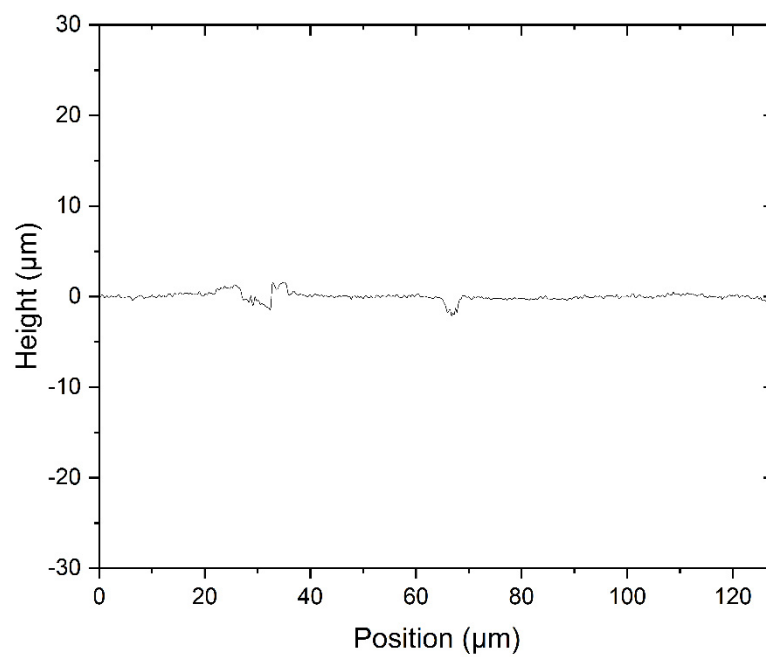

**Figure S3.** Height profile of CRATER sample.

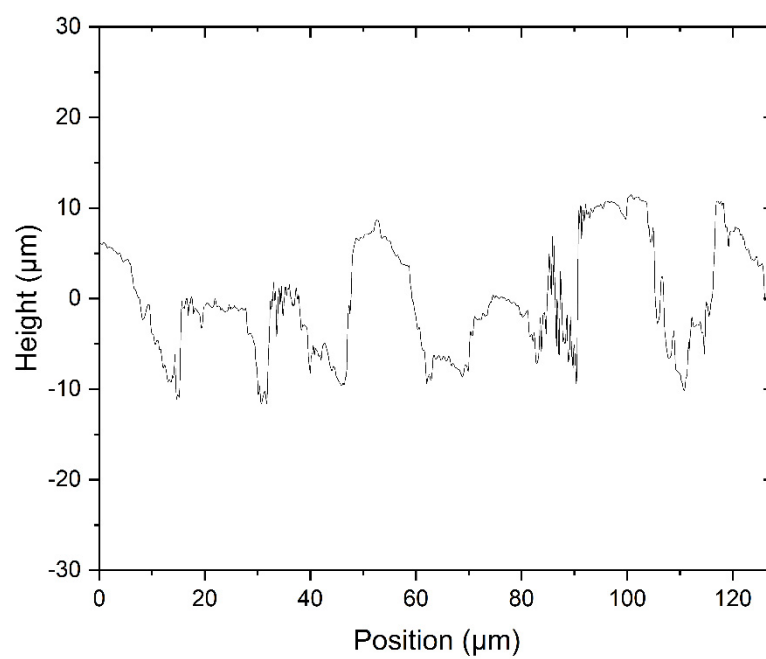

**Figure S4.** Height profile of MICRO sample.
